# Supplementary material for: Synthesis of Fe3O4–graphene–TiO2 ternary composite networks for enhanced capture of phosphopeptides
Source: Royal Society of Chemistry journal article supplement (doi:10.1039/c1cc15151g), 2011-01-01
Supplement: c1cc15151g.pdf [file c1cc15151g.pdf]

## Supporting Information

### Experimental Details

#### *Preparation of Fe<sub>3</sub>O<sub>4</sub>-GR-TiO<sub>2</sub>*

Fe<sub>3</sub>O<sub>4</sub> nanoparticles were obtained by microwave-hydrothermal strategy in a microwave accelerated reaction system MARS-5 (CEM, USA). In detail, 1g precursor FeCl<sub>3</sub> • 6H<sub>2</sub>O, 2g anhydrous sodium acetate and 6.5g 1,6-hexanediamine were dissolved into 30ml ethylene glycol and stirred until transparency. After that, the mixture was transferred into the microwave system and treated at 200°C for 30min. Then, it was washed with ethanol and water, separated by a permanent magnet and finally redispersed in de-ionized water for further use.

Graphene oxide (GO) was prepared from graphite powder (from Sigma) by a modified Hummers' method and dispersed in water to form a homogeneous solution with concentration of 0.5mg/ml. 4ml portion of Fe<sub>3</sub>O<sub>4</sub> suspension (5mg/ml) was mixed with 40ml of GO solution and vibrated in a shaker for 2h. After magnetic separation, 5mg of intermediate Fe<sub>3</sub>O<sub>4</sub>-GO was dispersed in alcohol/water (140ml/10ml) mixture and heated to 70°C. Then, 360μl Ti(BuO)<sub>4</sub> and 150μl H<sub>2</sub>SO<sub>4</sub> were added and the solution was mechanically stirred for 12h at the same temperature. The product named as Fe<sub>3</sub>O<sub>4</sub>-GO-TiO<sub>2</sub> was washed with ethanol and water for three times and recovered by magnetic separation.

Hydrothermal treatment was required for the synthesis of Fe<sub>3</sub>O<sub>4</sub>-GR-TiO<sub>2</sub>. As-prepared Fe<sub>3</sub>O<sub>4</sub>-GO-TiO<sub>2</sub> was dispersed in 30ml water and transferred into an autoclave for hydrothermal reaction at 200°C for 20h. Finally, the product was obtained and designated as Fe<sub>3</sub>O<sub>4</sub>-GR-TiO<sub>2</sub>.

#### *Tryptic digestion of proteins*

1mg of α- and β-casein were respectively dissolved in 1ml 50mM ammonium bicarbonate buffer solution (pH=8.1), and incubated with trypsin at the ratio of enzyme-to-substrate of 1:40 (w/w) in a shaker at 37°C for 16 h. 5mg of BSA was first denatured in 50mM ammonium bicarbonate solution containing 8M urea. After the addition of 5μl dithiothreitol (DTT) (1M), the solution was incubated in 60°C water bath for 1 h to reduce the disulfide bonds. Then, 10μl iodoacetamide (IAA) (1M) was introduced and the mixture was incubated in ambient temperature in dark for 40min. Finally, the solution was diluted 8-fold with 50mM ammonium bicarbonate buffer solution (pH=8.1) and digested by trypsin at the ratio of enzyme-to-substrate of 1:40 (w/w).

#### *Adsorption for tryptic digests of α-casein*

The adsorption experiments were carried out at 25°C in 50 mM ammonium bicarbonate buffer solution (pH=8.1). Known quantities of Fe<sub>3</sub>O<sub>4</sub>-GR-TiO<sub>2</sub> and commercial TiO<sub>2</sub> (0.5mg) were respectively added to 1ml tryptic digests of α-casein with varied concentrations ranging from 0.05 to 0.425mg/ml. The mixture was vibrated in shaker for 12 h, which allowed for adsorption to reach equilibrium. The concentration of peptides in the final solution was determined by monitoring the absorbance at 280nm.

### ***The capture of phosphopeptides by Fe<sub>3</sub>O<sub>4</sub>-GR-TiO<sub>2</sub>***

Digests for phosphopeptide capture were diluted with 6% trifluoroacetic acid (TFA) in 50% (v/v) ACN. 0.1mg Fe<sub>3</sub>O<sub>4</sub>-GR-TiO<sub>2</sub> was dispersed into 200μl tryptic digests of α- and β-casein (2pmol), and vibrated in a vortex for 30min. The supernatant was removed by magnetic separation, and Fe<sub>3</sub>O<sub>4</sub>-GR-TiO<sub>2</sub> combined with phosphopeptides was rinsed with 200μl 0.1%TFA solution in 80% (v/v) ACN with and then without 200mM NaCl, respectively. The trapped phosphopeptides were eluted by 20μl 10% NH<sub>3</sub>•H<sub>2</sub>O under sonication for 10min. After that, the supernatant was collected by magnetic separation. Consequently, 1μl resulting solution and 1μl 2,5-dihydroxybenzoicacid (DHB) solution (25mg/ml in 70% ACN) containing 1% H<sub>3</sub>PO<sub>4</sub> (v/v) were deposited in turn onto MALDI target for MALDI-TOF analysis.

Human serum used here was collected from 100 healthy adults in Nanjing University Hospital according to their standard clinical procedures. In our case, 10μl of human serum was diluted into 200μl 6% trifluoroacetic acid (TFA) in 50% (v/v) ACN, and then treated with Fe<sub>3</sub>O<sub>4</sub>-GR-TiO<sub>2</sub> in the procedure elucidated above for phosphopeptide capture.

### ***Mass spectrometry***

MALDI-TOF MS experiments were performed on a Bruker Autoflex II time-of-flight mass spectrometer (Bruker, Bremen, Germany), equipped with a delayed ion-extraction device and a pulsed nitrogen laser operated at 337nm. The range of laser energy was adjusted slightly to obtain good resolution and S/N. The instrument was operated in the positive ion reflector mode. The MALDI uses a ground-steel sample target with 384 spots. Each spectrum was summed with 100 laser shots.

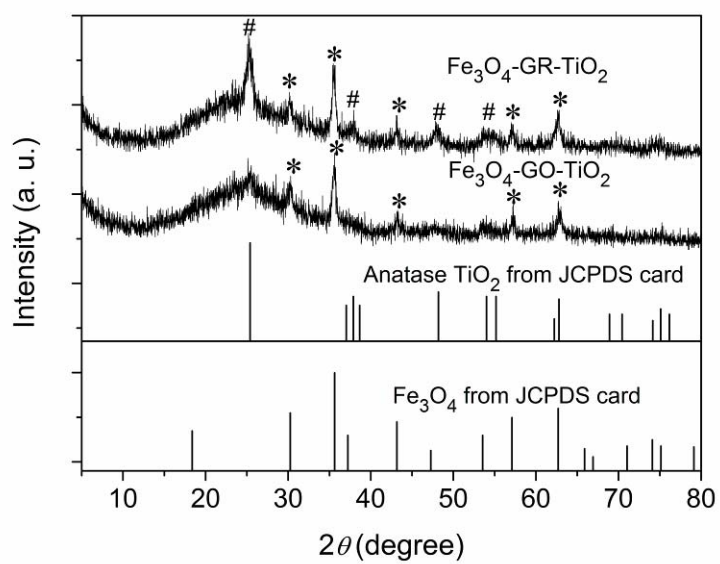

**Fig. S1** XRD pattern of  $\text{Fe}_3\text{O}_4\text{-GO-TiO}_2$  and  $\text{Fe}_3\text{O}_4\text{-GR-TiO}_2$ .

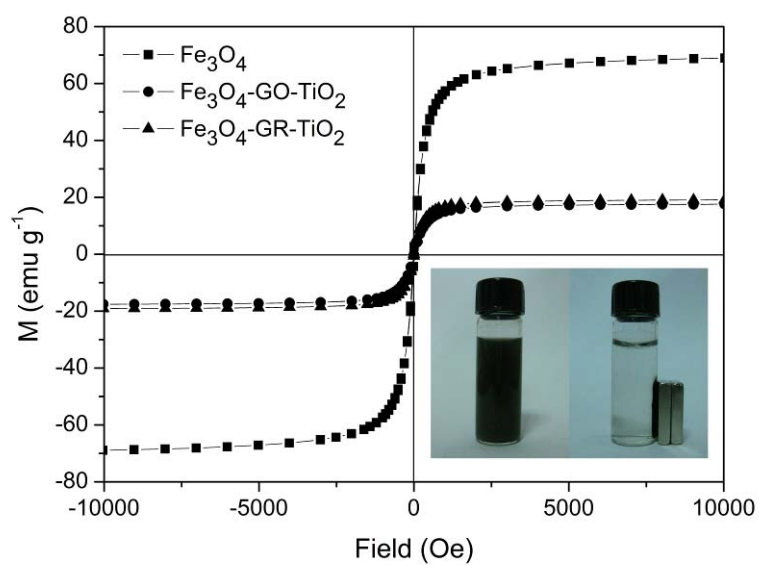

**Fig. S2** Room-temperature magnetization curves of  $\text{Fe}_3\text{O}_4$ ,  $\text{Fe}_3\text{O}_4\text{-GO-TiO}_2$  and  $\text{Fe}_3\text{O}_4\text{-GR-TiO}_2$ . Inset shows the magnetic response of  $\text{Fe}_3\text{O}_4\text{-GR-TiO}_2$  in the magnetic field generated from a magnet.

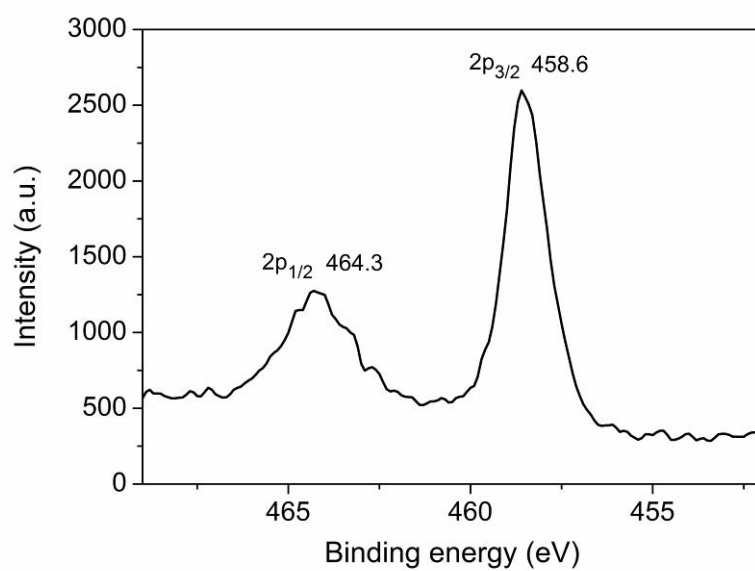

**Fig. S3** XPS spectra of Ti2p in the Fe<sub>3</sub>O<sub>4</sub>-GR-TiO<sub>2</sub> networks.

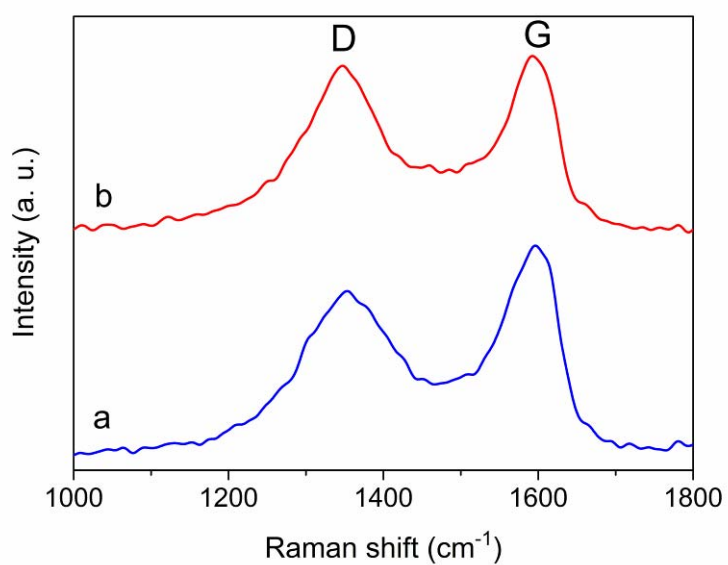

**Fig. S4** Raman spectra of Fe<sub>3</sub>O<sub>4</sub>-GO-TiO<sub>2</sub> (Intensity ratio  $I_D/I_G = 0.784$ ) (a) and Fe<sub>3</sub>O<sub>4</sub>-GR-TiO<sub>2</sub> ( $I_D/I_G = 0.944$ ) (b).

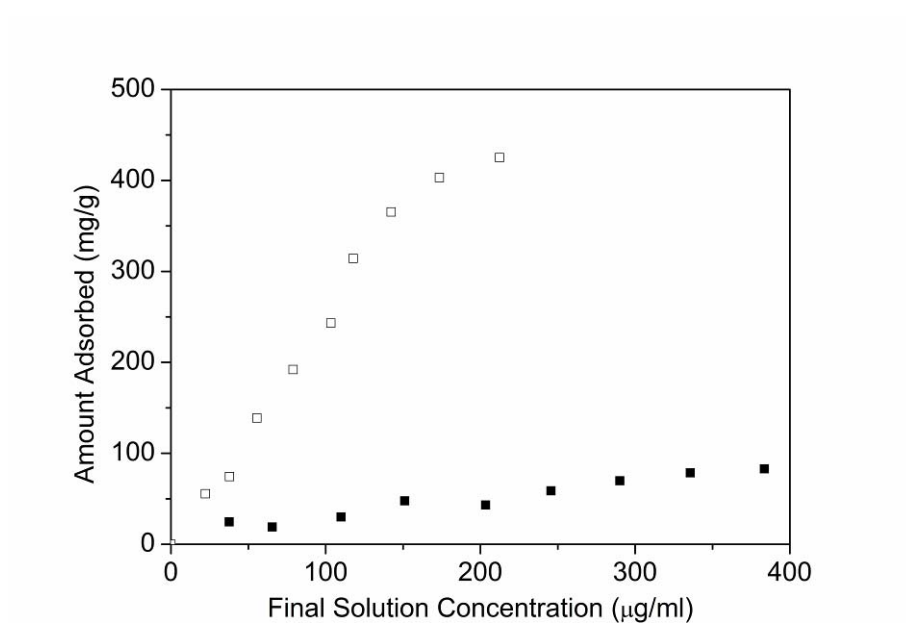

**Fig. S5** Adsorption isotherm for tryptic digests of  $\alpha$ -casein adsorbed on Fe<sub>3</sub>O<sub>4</sub>-GR-TiO<sub>2</sub> (□) and commercial TiO<sub>2</sub> (■).

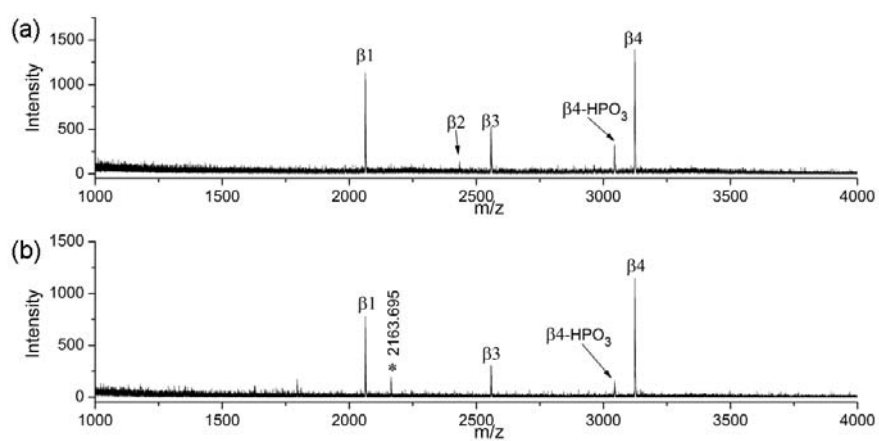

**Fig. S6** MALDI-TOF spectra of the tryptic digests of a mixture of  $\beta$ -casein and BSA at mole ratio of 1:10 (a) and 1:100 (b) after enriched by  $\text{Fe}_3\text{O}_4$ -GR- $\text{TiO}_2$ .

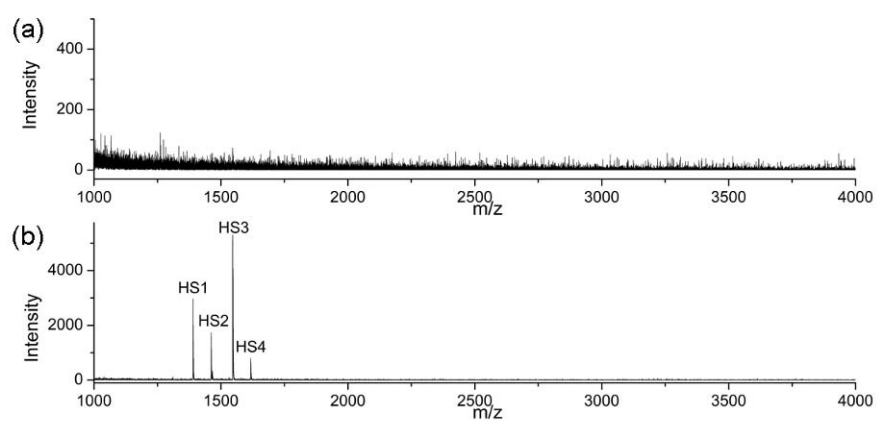

**Fig. S7** MALDI-TOF spectra of human serum by direct analysis (a) and enriched by Fe<sub>3</sub>O<sub>4</sub>-GR-TiO<sub>2</sub> (b).

**Table S1.** The phosphopeptides identified from tryptic digests of  $\beta$ -casein after enriched by  $\text{Fe}_3\text{O}_4$ -GR- $\text{TiO}_2$  in MALDI-TOF MS analysis.

| No.       | Peptide sequence                      | Number of phosphoryl groups | Observed m/z |
|-----------|---------------------------------------|-----------------------------|--------------|
| $\beta$ 1 | FQ[pS]EEQQQTEDELQDK                   | 1                           | 2061.828     |
| $\beta$ 2 | IEKFQ[pS]EEQQQTEDELQDK                | 1                           | 2432.050     |
| $\beta$ 3 | FQ[pS]EEQQQTEDELQDKIHPF               | 1                           | 2556.092     |
| $\beta$ 4 | RELEELNVPGEIVE[pS]L[pS][pS][pS]EESITR | 4                           | 3122.266     |

[pS]: phosphorylated site.

**Table S2.** The non-phosphopeptides identified from tryptic digests of  $\beta$ -casein after enriched by  $\text{Fe}_3\text{O}_4$ -GO- $\text{TiO}_2$  in MALDI-TOF MS analysis.

| Protein source    | Label | Peptide sequence     | Observed m/z |
|-------------------|-------|----------------------|--------------|
| $\beta$ -casein   | #     | VKEAMAPKHK           | 1138.023     |
| trypsin autolysis | *     | LGEDNINVVEGNEQFISASK | 2163.738     |

**Table S3.** The phosphopeptides identified from tryptic digests of  $\alpha$ -casein after enriched by  $\text{Fe}_3\text{O}_4\text{-GR-TiO}_2$  in MALDI-TOF MS analysis.

| No.         | Peptide sequence                        | Number of phosphoryl groups | Observed m/z |
|-------------|-----------------------------------------|-----------------------------|--------------|
| $\alpha 1$  | TVDME[pS]TEVF                           | 1                           | 1237.267     |
| $\alpha 2$  | TVD[Mo]ME[pS]TEVF                       | 1                           | 1253.142     |
| $\alpha 3$  | TVDME[pS]TEVFTK                         | 1                           | 1466.779     |
| $\alpha 4$  | TVD[Mo]E[pS]TEVFTK                      | 1                           | 1482.654     |
| $\alpha 5$  | EQL[pS]T[pS]EENSKK                      | 2                           | 1538.978     |
| $\alpha 6$  | VPQLEIVPN[pS]AEER                       | 1                           | 1660.949     |
| $\alpha 7$  | YLGEYLIVPN [pS]AEER                     | 1                           | 1833.197     |
| $\alpha 8$  | DIGSE[pS]TEDQAMEDIK                     | 1                           | 1848.213     |
| $\alpha 9$  | DIGSE[pS]TEDQA[Mo]EDIK                  | 1                           | 1864.366     |
| $\alpha 10$ | DIG[pS]E[pS]TEDQAMEDIK                  | 2                           | 1927.885     |
| $\alpha 11$ | DIG[pS]E[pS]TEDQA[Mo]EDIK               | 2                           | 1943.829     |
| $\alpha 12$ | YKVPQLEIVPN[pS]AEER                     | 1                           | 1952.109     |
| $\alpha 13$ | NTMEHV[pS][pS][pS]EESII[pS]QETYSK       | 4                           | 2619.391     |
| $\alpha 14$ | NT[Mo]EHV[pS][pS][pS]EESII[pS]QETYSK    | 4                           | 2635.332     |
| $\alpha 15$ | VNEL[pS]KDIG[pS]E[pS]TEDQAMEDIK         | 3                           | 2678.944     |
| $\alpha 16$ | VNEL[pS]KDIG[pS]E[pS]TEDQA[Mo]EDIK      | 3                           | 2695.032     |
| $\alpha 17$ | Q*MEAE[pS]I[pS][pS] [pS]EEIVPN[pS]VEAQK | 5                           | 2703.758     |
| $\alpha 18$ | QMEAE[pS]I[pS][pS][pS]EEIVPNPN[pS]VEQK  | 5                           | 2720.822     |
| $\alpha 19$ | KEKVNEL[pS]KDIG[pS]E[pS]TEDQAMEDIKQ     | 3                           | 2936.202     |
| $\alpha 20$ | KEKVNEL[pS]KDIG[pS]E[pS]TEDQA[Mo]EDIKQ  | 3                           | 2952.388     |
| $\alpha 21$ | NANEEYYSIG[pS][pS][pS]EE[pS]AEVATEEVK   | 4                           | 3008.618     |
| $\alpha 22$ | NANEEY[pS]IG[pS][pS][pS]EE[pS]AEVATEEVK | 5                           | 3088.415     |

[pS]: phosphorylated site;

[Mo]: oxidation on methionine;

\*Pyroglutamylation on the N-terminal Q.

**Table S4.** The phosphopeptides identified from human serum after enriched by  $\text{Fe}_3\text{O}_4\text{-GR-TiO}_2$  in MALDI-TOF MS analysis.

| No. | Peptide sequence    | Number of phosphoryl groups | Observed m/z |
|-----|---------------------|-----------------------------|--------------|
| HS1 | D[pS]GEGDFLAEGGGV   | 1                           | 1389.588     |
| HS2 | AD[pS]GEGDFLAEGGGV  | 1                           | 1460.677     |
| HS3 | D[pS]GEGDFLAEGGGVR  | 1                           | 1545.750     |
| HS4 | AD[pS]GEGDFLAEGGGVR | 1                           | 1616.738     |

[pS]: phosphorylated site.
